# Supplementary material
Source: PubMed Central journal article supplement (PMC11002768)
Supplement: jama-e244504-s003.pdf [file jama-e244504-s003.pdf]

## Supplementary Online Content

Nissen SE, Wolski K, Watts GF, et al. Single ascending and multiple dose trial of zerlasiran, a short-interfering RNA targeting lipoprotein(a): a randomized clinical trial. *JAMA*. doi:10.1001/jama.2024.4504

### Acknowledgments

**eTable 1.** Injection Site Assessment 2 Days After Injection Using the FDA Vaccine Product Injection Site Reaction Grading Scale

**eTable 2.** Lipoprotein(a) Concentration Over Time During Extended Follow-Up in the Single-Dose Cohort

**eTable 3.** Lipoprotein (a) Concentration Over Time in Multiple-Dose Cohort

**eTable 4.** Change in LDL-C During Multidose Phase of the Trial

**eTable 5.** Change in Apo B During Multiple-Dose Phase of the Trial

**eTable 6.** Absolute and Percent Change in Oxidized LDL-C During Multiple-Dose Phase of the Trial

**eFigure 1.** Schematic of the Phase 1 Trial Showing the Ascending-Dose Approach for Single and Multiple Doses

**eFigure 2.** Distribution of Baseline Lipoprotein(a) Levels

**eFigure 3.** Plasma Concentrations of Zerlasiran After the First and Second Administered Doses

**eFigure 4.** Observed Lipoprotein(a) Concentrations During 365 Days Follow-Up After a Single Dose

**eFigure 5.** Observed Lipoprotein(a) Concentrations During 201 Days Follow-Up After Multiple Doses

**eFigure 6.** Percent Change in LDL-C During 201 Days Follow-up After Multiple Doses

**eFigure 7.** Percent Change in Apo B During 201 Days Follow-Up After Multiple Doses

This supplementary material has been provided by the authors to give readers additional information about their work.

**Acknowledgements:****Silence Therapeutics Inc:**

Giles Campion (Chief Medical Officer), Lavita Menezes and Gareth Rees (Clinical Operations), Nick Alison (Data Manager) and Sanjay Patel BSc (Senior Project Manager, Silence Therapeutics plc; employees of Silence Therapeutics). Michael Szarek independent consultant provided waterfall plots of Lp(a) responses.

**Safety Review Committee:**

James H. Stein MD (Chairman; University of Wisconsin), Paul A. Gurbel MD. (Lifebridge Health), Jamie P. Dwyer MD. (Vanderbilt University), Raul J. Andrade MD, PhD (University of Malaga Hospital

**Medpace:**

Erika Richter BA (Clinical Trial Manager), Tyler Karwoski-Blaker MS (Project Coordinator), Richard Lee MD (Medical Monitor), , Kerry O'Rourke MS (Data Team Lead), Allyson Chamberlain BS (IRT Team Lead), Christelle Biame (US Regulatory Lead), Marijke Schroyens BS (Global Regulatory Lead), Judy Deglow BS (Reference Labs Lead), Ruixuan Xu MS (Biostatistical Lead), Helena Gikas BS (Safety Lead), , Juan Liang PhD (Statistician). All are employees of Medpace Inc.

**Investigators:**

**Australia**, Gerald Watts, MD, DSc (Linear Clinical Research Ltd.), Stephen J. Nicholls MBBS PhD (Victorian Heart Institute, Monash University) **Netherlands**, Erik Stroes MD, PhD (Amsterdam Academic Medical Center), **United Kingdom**, Malcom Boyce, MD, Takahiro Yamamoto, MD (Hammersmith Medicines Research Ltd.), **United States**, Leslie Cho, MD (Cleveland Clinic). Alexander White MD (Progressive Medical Research) Michael Koren MD (Jacksonville Center for Clinical Research)

**eTable 1. Injection Site Assessment 2 Days After Injection Using the FDA Vaccine Product Injection Site Reaction Grading Scale**

|                            | All Participants<br>(n=29)* | 200 mg<br>Q4wk x2<br>(n=5) | 300 mg<br>Q8wk x2<br>(n=9) | 450 m<br>Q8wk x2<br>(n=9) | Placebo<br>(n=6) |
|----------------------------|-----------------------------|----------------------------|----------------------------|---------------------------|------------------|
| <b>Pain</b>                |                             |                            |                            |                           |                  |
| None – grade 0             | 22 (76)                     | 4 (80)                     | 6 (67)                     | 6 (67)                    | 6 (100)          |
| Mild – grade 1             | 7 (24)                      | 1 (20)                     | 3 (33)                     | 3 (33)                    | 0 (0)            |
| Moderate – grade 2         | 0 (0)                       | 0 (0)                      | 0 (0)                      | 0 (0)                     | 0 (0)            |
| Severe – grade 3           | 0 (0)                       | 0 (0)                      | 0 (0)                      | 0 (0)                     | 0 (0)            |
| <b>Tenderness</b>          |                             |                            |                            |                           |                  |
| None – grade 0             | 17 (59)                     | 3 (60)                     | 6 (67)                     | 2 (22)                    | 6 (100)          |
| Mild – grade 1             | 10 (35)                     | 1 (20)                     | 3 (33)                     | 6 (67)                    | 0 (0)            |
| Moderate – grade 2         | 2 (7)                       | 1 (20)                     | 0 (0)                      | 1 (11)                    | 0 (0)            |
| Severe – grade 3           | 0 (0)                       | 0 (0)                      | 0 (0)                      | 0 (0)                     | 0 (0)            |
| <b>Erythema/redness †</b>  |                             |                            |                            |                           |                  |
| None – grade 0             | 6 (21)                      | 0 (0)                      | 1 (11)                     | 0 (0)                     | 5 (83)           |
| Mild – grade 1             | 5 (17)                      | 0 (0)                      | 1 (11)                     | 3 (33)                    | 1 (17)           |
| Moderate – grade 2         | 7 (24)                      | 3 (60)                     | 4 (44)                     | 0 (0)                     | 0 (0)            |
| Severe – grade 3           | 11 (38)                     | 2 (40)                     | 3 (33)                     | 6 (67)                    | 0 (0)            |
| <b>Induration/swelling</b> |                             |                            |                            |                           |                  |
| None – grade 0             | 25 (86)                     | 5 (100)                    | 9 (100)                    | 5 (56)                    | 6 (100)          |
| Mild – grade 1             | 2 (7)                       | 0 (0)                      | 0 (0)                      | 2 (22)                    | 0 (0)            |
| Moderate – grade 2         | 1 (3)                       | 0 (0)                      | 0 (0)                      | 1 (11)                    | 0 (0)            |
| Severe – grade 3           | 0 (0)                       | 0 (0)                      | 0 (0)                      | 0 (0)                     | 0 (0)            |

\*n represents number of participants with non-missing values

† Four patients at day 7 had moderate or severe erythema/redness (1 in 200 mg q4wk x2 dose, 2 in 300 mg q8wk x2 dose, and 1 in 450 mg q8wk x2 dose)

**eTable 2. Lipoprotein(a) Concentration Over Time During Extended Follow-Up in the Single-Dose Cohort**

| Time from Baseline   |                        | 300 mg (N=6)                                               | 600 mg (N=6)             | Placebo (N=8)         |
|----------------------|------------------------|------------------------------------------------------------|--------------------------|-----------------------|
|                      |                        | <b>Median Baseline Lipoprotein(a) in nmol/L (IQR)</b>      |                          |                       |
|                      |                        | 285 (195,338)                                              | 231 (179,276)            | 238 (203,308)         |
|                      |                        | <b>Median Level and Change from Baseline, nmol/L (IQR)</b> |                          |                       |
| Day 7                | <i>Value</i>           | <i>121 (75,214)</i>                                        | <i>115 (90,130)</i>      | <i>227 (175,319)</i>  |
|                      | <i>Absolute change</i> | <i>-145 (-182,-100)</i>                                    | <i>-113 (-153,-90)</i>   | <i>-12 (-33,13)</i>   |
|                      | <i>Percent change</i>  | <i>-52 (-62,-44)</i>                                       | <i>-48 (-54,-45)</i>     | <i>-3 (-14,5)</i>     |
| Day 14               | <i>Value</i>           | <i>48 (24, 101)</i>                                        | <i>42 (33, 55)</i>       | <i>233 (177, 306)</i> |
|                      | <i>Absolute change</i> | <i>-235 (-261, -152)</i>                                   | <i>-179 (-242, -149)</i> | <i>-14 (-52, 11)</i>  |
|                      | <i>Percent change</i>  | <i>-81 (-88, -75)</i>                                      | <i>-78 (-83, -76)</i>    | <i>-3 (-18, 5)</i>    |
| Day 30               | <i>Value</i>           | <i>18 (5, 46)</i>                                          | <i>10 (7, 13)</i>        | <i>251 (176, 309)</i> |
|                      | <i>Absolute change</i> | <i>-268 (-292, -189)</i>                                   | <i>-219 (-272, -172)</i> | <i>-10 (-45, 10)</i>  |
|                      | <i>Percent change</i>  | <i>-95 (-97, -91)</i>                                      | <i>-95 (-96, -94)</i>    | <i>-4 (-12, 5)</i>    |
| Day 60               | <i>Value</i>           | <i>14 (4, 58)</i>                                          | <i>6 (6, 9)</i>          | <i>265 (168, 282)</i> |
|                      | <i>Absolute change</i> | <i>-254 (-267, -194)</i>                                   | <i>-227 (-270, -174)</i> | <i>-20 (-61, 3)</i>   |
|                      | <i>Percent change</i>  | <i>-96 (-98, -82)</i>                                      | <i>-98 (-98, -97)</i>    | <i>-10 (-16, 1)</i>   |
| Day 90               | <i>Value</i>           | <i>35 (9, 106)</i>                                         | <i>17 (6, 25)</i>        | <i>234 (177, 298)</i> |
|                      | <i>Absolute change</i> | <i>-199 (-248, -174)</i>                                   | <i>-222 (-251, -174)</i> | <i>-11 (-58, 23)</i>  |
|                      | <i>Percent change</i>  | <i>-87 (-96, -66)</i>                                      | <i>-95 (-97, -91)</i>    | <i>1 (-24, 10)</i>    |
| Day 120              | <i>Value</i>           | NA                                                         | NA                       | NA                    |
|                      | <i>Absolute change</i> | NA                                                         | NA                       | NA                    |
|                      | <i>Percent change</i>  | NA                                                         | NA                       | NA                    |
| Day 150 <sup>a</sup> | <i>Value</i>           | <i>86 (31, 153)</i>                                        | <i>49 (21, 61)</i>       | <i>244 (192, 319)</i> |
|                      | <i>Absolute change</i> | <i>-177 (-226, -78)</i>                                    | <i>-173 (-222, -159)</i> | <i>-13 (-48, 16)</i>  |
|                      | <i>Percent change</i>  | <i>-71 (-87, -48)</i>                                      | <i>-81 (-92, -67)</i>    | <i>-5 (-16, 8)</i>    |
| Day 180 <sup>a</sup> | <i>Value</i>           | NA                                                         | NA                       | NA                    |
|                      | <i>Absolute change</i> | NA                                                         | NA                       | NA                    |
|                      | <i>Percent change</i>  | NA                                                         | NA                       | NA                    |
| Day 210 <sup>a</sup> | <i>Value</i>           | <i>160 (85, 249)</i>                                       | <i>135 (84, 148)</i>     | <i>284 (186, 297)</i> |
|                      | <i>Absolute change</i> | <i>-119 (-356, -38)</i>                                    | <i>-117 (-129, -97)</i>  | <i>38 (6, 74)</i>     |
|                      | <i>Percent change</i>  | <i>-51 (-73, -20)</i>                                      | <i>-45 (-72, -42)</i>    | <i>14 (3, 35)</i>     |
| Day 270 <sup>a</sup> | <i>Value</i>           | <i>178 (82, 277)</i>                                       | <i>148 (141, 160)</i>    | <i>237 (191, 297)</i> |
|                      | <i>Absolute change</i> | <i>-122 (-294, -76)</i>                                    | <i>-128 (-145, -72)</i>  | <i>26 (10, 38)</i>    |
|                      | <i>Percent change</i>  | <i>-59 (-60, -39)</i>                                      | <i>-46 (-50, -31)</i>    | <i>12 (5, 14)</i>     |
| Day 330 <sup>a</sup> | <i>Value</i>           | <i>213 (116, 296)</i>                                      | <i>144 (134, 228)</i>    | <i>237 (191, 269)</i> |
|                      | <i>Absolute change</i> | <i>-108 (-297, -19)</i>                                    | <i>-79 (-135, -19)</i>   | <i>10 (10, 27)</i>    |
|                      | <i>Percent change</i>  | <i>-35 (-63, -6)</i>                                       | <i>-35 (-43, -12)</i>    | <i>6 (4, 13)</i>      |
| Day 365 <sup>a</sup> | <i>Value</i>           | <i>236 (124, 335)</i>                                      | <i>155 (142, 215)</i>    | <i>240 (204, 298)</i> |
|                      | <i>Absolute change</i> | <i>-102 (-136, -28)</i>                                    | <i>-68 (-134, -17)</i>   | <i>29 (24, 39)</i>    |
|                      | <i>Percent change</i>  | <i>-30 (-51, -18)</i>                                      | <i>-29 (-39, -7)</i>     | <i>14 (13, 15)</i>    |

Italicized values represent data previously published in the first-in-human study. <sup>a</sup>After day 150, there were 5 participants in the 300 mg dose group, 6 in the 600 mg dose group and 3 in the placebo group.

**eTable 3. Lipoprotein (a) Concentration Over Time in Multiple-Dose Cohort**

| Time From baseline |                 | Dose Group                                                 |                            |                            |                  |
|--------------------|-----------------|------------------------------------------------------------|----------------------------|----------------------------|------------------|
|                    |                 | 200 mg<br>Q4wk x2<br>(N=9)                                 | 300 mg<br>Q8wk x2<br>(N=8) | 450 mg<br>Q8wk x2<br>(N=9) | Placebo<br>(N=9) |
|                    |                 | <b>Median Baseline, nmol/L (IQR)</b>                       |                            |                            |                  |
|                    |                 | 266 (194,295)                                              | 316 (276, 377)             | 247 (183, 350)             | 292 (217, 389)   |
|                    |                 | <b>Median Level and Change from Baseline, nmol/L (IQR)</b> |                            |                            |                  |
| Day 7              | Value           | 162 (129,173)                                              | 170 (119, 237)             | 136 (80,154)               | 329 (208,369)    |
|                    | Absolute change | -100 (-115, -72)                                           | -153 (-178, -113)          | -137 (-155,-111)           | -0.9 (-9, 15)    |
|                    | Percent change  | -39 (-42,-35)                                              | -45 (-53, -39)             | -48 (-59, -45)             | -0.5 (-2, 5)     |
| Day 14             | Value           | 71 (63, 79)                                                | 50 (38, 120)               | 58 (30, 64)                | 321 (224, 364)   |
|                    | Absolute change | -149 (-217, -141)                                          | -254 (-295, -211)          | -209 (-275, -154)          | 2 (-22, 7)       |
|                    | Percent change  | -73 (-75, -67)                                             | -79 (-87, -72)             | -83 (-84, -78)             | 0.5 (-12, 3)     |
| Day 30             | Value           | 19 (16, 31)                                                | 18 (7, 36)                 | 10 (7, 13)                 | 355 (235, 385)   |
|                    | Absolute change | -235 (-276, -176)                                          | -300 (-339, -268)          | -234 (-329, -180)          | -0.7 (-24, 57)   |
|                    | Percent change  | -93 (-94, -88)                                             | -95 (-97, -91)             | -95 (-97, -95)             | -0.4 (-6, 17)    |
| Day 60             | Value           | 8 (6, 9)                                                   | 18 (7, 36)                 | 10 (3, 20)                 | 370 (227, 379)   |
|                    | Absolute change | -258 (-289, -188)                                          | -300 (-341, -268)          | -236 (-278, -180)          | 10 (-16, 53)     |
|                    | Percent change  | -97 (-98, -95)                                             | -94 (-97, -91)             | -95 (-98, -94)             | 2 (-4, 14)       |
| Day 90             | Value           | 20 (8, 24)                                                 | 5 (1, 11)                  | 4 (1, 5)                   | 348 (225, 394)   |
|                    | Absolute change | -251 (-288, -183)                                          | -310 (-368, -274)          | -242 (-343, -182)          | 0.6 (-9, 24)     |
|                    | Percent change  | -94 (-97, -88)                                             | -98 (-99, -97)             | -99 (-99, -98)             | 1 (-3, 8)        |
| Day 120            | Value           | 39 (26, 53)                                                | 8 (4, 20)                  | 6 (1, 7)                   | 356 (216, 365)   |
|                    | Absolute change | -220 (-270, -168)                                          | -304 (-360, -273)          | -240 (-348, -182)          | -1 (-25, 9)      |
|                    | Percent change  | -82 (-91, -80)                                             | -98 (-99, -94)             | -98 (-99, -96)             | -0.6 (-9, 5)     |
| Day 150            | Value           | 68 (60, 91)                                                | 14 (9, 35)                 | 12 (5, 15)                 | 342 (232, 370)   |
|                    | Absolute change | -216 (-243, -136)                                          | -295 (-344, -267)          | -233 (-306, -180)          | 19 (-17, 28)     |
|                    | Percent change  | -70 (-77, -65)                                             | -96 (-97, -90)             | -96 (-97, -92)             | 7 (-4, 21)       |
| Day 180            | Value           | 88 (76, 115)                                               | 36 (21, 55)                | 23 (10, 29)                | 319 (215, 401)   |
|                    | Absolute change | -178 (-209, -126)                                          | -276 (-309, -248)          | -194 (-266, -157)          | 7 (-2, 27)       |
|                    | Percent change  | -61 (-73, -55)                                             | -90 (-93, -82)             | -92 (-94, -84)             | 2 (-0.7, 7)      |
| Day 201            | Value           | 117 (82, 140)                                              | 35 (27, 83)                | 30 (20, 47)                | 368 (240, 417)   |
|                    | Absolute change | -146 (-206, -126)                                          | -263 (-286, -221)          | -164 (-262, -155)          | 0.4 (-6, 41)     |
|                    | Percent change  | -60 (-71, -40)                                             | -90 (-91, -74)             | -89 (-91, -76)             | 0.3 (-2, 21)     |

**eTable 4. Change in LDL-C During Multidose Phase of the Trial**

| Time from Baseline                                                    |                   | (n=9)<br>200mg Q4W                                       | (n=8)<br>300mg Q8W | (n=9)<br>450mg Q8W | Placebo<br>(n=9) |
|-----------------------------------------------------------------------|-------------------|----------------------------------------------------------|--------------------|--------------------|------------------|
|                                                                       |                   | <b>Median Baseline LDL Cholesterol in mg/dL (Q1, Q3)</b> |                    |                    |                  |
|                                                                       |                   | 68 (45, 77)                                              | 59 (45, 69)        | 65 (55, 85)        | 58 (51, 89)      |
| <b>Median change from baseline in LDL Cholesterol, mg/dL (Q1, Q3)</b> |                   |                                                          |                    |                    |                  |
| 7 days                                                                | Absolute Change   | -6 (-19, 11)                                             | 4 (-13, 15)        | -11 (-13, -6)      | 1 (-6, 2)        |
|                                                                       | Percentage Change | -9 (-16, 17)                                             | 6 (-23, 33)        | -15 (-16, -11)     | 3 (-11, 3)       |
| 14 days                                                               | Absolute Change   | -7 (-23, -2)                                             | -15 (-38, -6)      | -17 (-19, -11)     | 1 (-2, 5)        |
|                                                                       | Percentage Change | -13 (-22, -2)                                            | -45 (-60, -11)     | -21 (-30, -17)     | 2 (-5, 7)        |
| 30 days                                                               | Absolute Change   | -22 (-32, -3)                                            | -25 (-40, -8)      | -13 (-35, -11)     | -2 (-9, -1)      |
|                                                                       | Percentage Change | -27 (-43, -8)                                            | -47 (-64, -12)     | -20 (-25, -14)     | -3 (-15, -1)     |
| 36 days*                                                              | Absolute Change   | -22 (-40, -4)                                            | NA                 | NA                 | 8 (-4, 13)       |
|                                                                       | Percentage Change | -29 (-50, -9)                                            | NA                 | NA                 | 13 (-8, 22)      |
| 43 days*                                                              | Absolute Change   | -29 (-47, -8)                                            | NA                 | NA                 | -6 (-9, -6)      |
|                                                                       | Percentage Change | -31 (-61, -19)                                           | NA                 | NA                 | -12 (-15, -10)   |
| 60 days                                                               | Absolute Change   | -28 (-39, -17)                                           | -17 (-35, 5)       | -14 (-30, -12)     | 1 (-3, 7)        |
|                                                                       | Percentage Change | -35 (-45, -26)                                           | -31 (-58, 13)      | -22 (-38, -18)     | 2 (-5, 14)       |
| 66 days**                                                             | Absolute Change   | NA                                                       | -22 (-31, -1)      | -17 (-25, -14)     | -5 (-7, 0)       |
|                                                                       | Percentage Change | NA                                                       | -34 (-52, -2)      | -26 (-35, -9)      | -8 (-10, 0)      |
| 73 days**                                                             | Absolute Change   | NA                                                       | -19 (-34, -7)      | -18 (-25, -11)     | -3 (-19, 6)      |
|                                                                       | Percentage Change | NA                                                       | -31 (-57, -11)     | -26 (-34, -12)     | -6 (-17, 13)     |
| 90 days                                                               | Absolute Change   | -20 (-39, -1)                                            | -23 (-32, -13)     | -30 (-38, -11)     | -4 (-4, 8)       |
|                                                                       | Percentage Change | -26 (-45, 0)                                             | -35 (-50, -21)     | -28 (-38, -26)     | -4 (-6, 14)      |
| 120 days                                                              | Absolute Change   | -24 (-30, -2)                                            | -9 (-19, -1)       | -10 (-43, -8)      | 1 (-2, 9)        |
|                                                                       | Percentage Change | -26 (-37, -3)                                            | -13 (-40, -2)      | -25 (-46, -12)     | 2 (-4, 16)       |
| 150 days                                                              | Absolute Change   | -22 (-31, -4)                                            | -11 (-17, -5)      | -19 (-31, -4)      | 7 (-1, 17)       |
|                                                                       | Percentage Change | -31 (-42, -9)                                            | -24 (-36, -7)      | -17 (-33, -8)      | 17 (-2, 29)      |
| 180 days                                                              | Absolute Change   | 11 (-15, 28)                                             | -12 (-14, -9)      | -11 (-13, -6)      | 1 (0, 7)         |
|                                                                       | Percentage Change | 9 (-19, 55)                                              | -18 (-25, -12)     | -14 (-20, -8)      | 2 (0, 12)        |
| 201 days                                                              | Absolute Change   | -2 (-31, 7)                                              | -8 (-14, -2)       | -9 (-22, -1)       | 4 (3, 6)         |
|                                                                       | Percentage Change | -2 (-34, 22)                                             | -13 (-34, -2)      | -11 (-28, 0)       | 7 (6, 10)        |

**eTable 5. Change in Apo B During Multiple-Dose Phase of the Trial**

| Time from Baseline |                   | (n=9)                                                           | (n=8)          | (n=9)          | Placebo     |
|--------------------|-------------------|-----------------------------------------------------------------|----------------|----------------|-------------|
|                    |                   | 200mg Q4W                                                       | 300mg Q8W      | 450mg Q8W      | (n=9)       |
|                    |                   | Median Baseline Apolipoprotein B in mg/dL (Q1, Q3)              |                |                |             |
|                    |                   | 63 (45, 72)                                                     | 58 (52, 67)    | 65 (58, 70)    | 63 (61, 81) |
|                    |                   | Median Change from Baseline in Apolipoprotein B, mg/dL (Q1, Q3) |                |                |             |
| 7 days             | Absolute Change   | -2 (-11, 5)                                                     | 0 (-6, 5)      | -7 (-10, -2)   | 2 (-2, 3)   |
|                    | Percentage Change | -3 (-9, 11)                                                     | 0 (-10, 7)     | -11 (-11, -4)  | 4 (-3, 5)   |
| 14 days            | Absolute Change   | -6 (-18, 2)                                                     | -12 (-17, -4)  | -7 (-14, -6)   | 3 (0, 5)    |
|                    | Percentage Change | -17 (-21, 3)                                                    | -22 (-35, -5)  | -15 (-17, -10) | 3 (0, 11)   |
| 30 days            | Absolute Change   | -10 (-28, -2)                                                   | -18 (-20, -11) | -11 (-30, -9)  | -2 (-9, 0)  |
|                    | Percentage Change | -25 (-28, -4)                                                   | -25 (-39, -19) | -17 (-26, -13) | -3 (-10, 0) |
| 36 days*           | Absolute Change   | -11 (-36, -6)                                                   | NA             | NA             | 1 (0, 4)    |
|                    | Percentage Change | -23 (-37, -10)                                                  | NA             | NA             | 2 (0, 9)    |
| 43 days*           | Absolute Change   | -13 (-26, -4)                                                   | NA             | NA             | -4 (-7, 1)  |
|                    | Percentage Change | -26 (-35, -8)                                                   | NA             | NA             | -6 (-11, 2) |
| 60                 | Absolute Change   | -13 (-21, -4)                                                   | -14 (-23, -3)  | -12 (-17, -10) | 2 (-5, 11)  |
|                    | Percentage Change | -20 (-29, -9)                                                   | -24 (-41, -6)  | -21 (-22, -17) | 5 (-8, 10)  |
| 66 days**          | Absolute Change   | NA                                                              | -12 (-19, 0)   | -16 (-21, -8)  | -3 (-7, 0)  |
|                    | Percentage Change | NA                                                              | -21 (-29, 0)   | -19 (-23, -17) | -3 (-7, 0)  |
| 73 days**          | Absolute Change   | NA                                                              | -17 (-26, -10) | -15 (-18, -9)  | -5 (-7, 2)  |
|                    | Percentage Change | NA                                                              | -28 (-44, -16) | -19 (-24, -15) | -4 (-11, 3) |
| 90 days            | Absolute Change   | -5 (-23, 2)                                                     | -17 (-23, -12) | -14 (-30, -10) | -2 (-7, 7)  |
|                    | Percentage Change | -11 (-31, 3)                                                    | -28 (-37, -21) | -23 (-34, -22) | -3 (-9, 10) |
| 120 days           | Absolute Change   | -9 (-18, -6)                                                    | -14 (-18, -8)  | -16 (-27, -8)  | 0 (-7, 2)   |
|                    | Percentage Change | -15 (-19, -12)                                                  | -23 (-29, -11) | -22 (-36, -13) | 0 (-11, 2)  |
| 150 days           | Absolute Change   | -8 (-19, -1)                                                    | -12 (-19, -6)  | -9 (-23, -4)   | 7 (2, 10)   |
|                    | Percentage Change | -14 (-23, -1)                                                   | -21 (-30, -10) | -14 (-22, -7)  | 12 (2, 17)  |
| 180 days           | Absolute Change   | 12 (-6, 28)                                                     | -9 (-19, -4)   | -5 (-18, 0)    | 5 (-5, 10)  |
|                    | Percentage Change | 21 (-8, 51)                                                     | -14 (-28, -6)  | -8 (-16, 0)    | 11 (-5, 19) |
| 201 days           | Absolute Change   | -2 (-7, 10)                                                     | -3 (-11, 6)    | -12 (-23, 0)   | 8 (4, 11)   |
|                    | Percentage Change | -4 (-20, 24)                                                    | -5 (-20, 8)    | -10 (-35, 0)   | 9 (6, 17)   |

**eTable 6. Absolute and Percent Change in Oxidized LDL-C During Multiple-Dose Phase of the Trial**

| Time from Baseline                                                        |                   | (n=9)<br>200mg Q4W                                  | (n=8)<br>300mg Q8W | (n=9)<br>450mg Q8W | Placebo<br>(n=9) |
|---------------------------------------------------------------------------|-------------------|-----------------------------------------------------|--------------------|--------------------|------------------|
|                                                                           |                   | Mean Baseline Oxidized LDL Cholesterol in U/L* (SD) |                    |                    |                  |
|                                                                           |                   | 48 (25)                                             | 42 (13)            | 57 (41)            | 49 (17)          |
| <b>Mean Change from Baseline in Oxidized LDL Cholesterol in U/L* (SD)</b> |                   |                                                     |                    |                    |                  |
| 7 days                                                                    | Absolute Change   | -2 (8)                                              | 1 (9)              | -15 (25)           | 1.5 (10)         |
|                                                                           | Percentage Change | -2 (19)                                             | 7 (24)             | -16 (19)           | 6 (19)           |
| 14 days                                                                   | Absolute Change   | -7 (10)                                             | -7 (10)            | -18 (27)           | -2 (10)          |
|                                                                           | Percentage Change | -10 (20)                                            | -17 (19)           | -22 (18)           | -0.6 (19)        |
| 30 days                                                                   | Absolute Change   | -7 (9)                                              | -6 (16)            | -20 (28)           | -3 (7)           |
|                                                                           | Percentage Change | -13 (12)                                            | -7 (50)            | -26 (23)           | -5 (13)          |
| 36 days                                                                   | Absolute Change   | -9 (9)                                              | NA                 | NA                 | -1 (4)           |
|                                                                           | Percentage Change | -18 (14)                                            | NA                 | NA                 | -2 (10)          |
| 43 days                                                                   | Absolute Change   | -9 (9)                                              | NA                 | NA                 | -1 (8)           |
|                                                                           | Percentage Change | -19 (13)                                            | NA                 | NA                 | -1 (19)          |
| 60                                                                        | Absolute Change   | -5 (11)                                             | -5 (12)            | -19 (27)           | 14 (43)          |
|                                                                           | Percentage Change | -11 (20)                                            | -13 (26)           | -24 (19)           | 32 (84)          |
| 66 days                                                                   | Absolute Change   | NA                                                  | -4 (13)            | -17 (26)           | -5 (11)          |
|                                                                           | Percentage Change | NA                                                  | -4 (36)            | -21 (26)           | -7 (19)          |
| 73 days                                                                   | Absolute Change   | NA                                                  | -10 (11)           | -20 (28)           | -5 (11)          |
|                                                                           | Percentage Change | NA                                                  | -23 (25)           | -23 (20)           | -4 (21)          |
| 90 days                                                                   | Absolute Change   | -3 (14)                                             | -8 (12)            | -18 (25)           | -2 (12)          |
|                                                                           | Percentage Change | -5 (25)                                             | -15 (33)           | -23 (28)           | 1 (22)           |
| 120 days                                                                  | Absolute Change   | -2 (9)                                              | -5 (7)             | -18 (24)           | 0.6 (14)         |
|                                                                           | Percentage Change | -2 (15)                                             | -14 (22)           | -25 (26)           | 9 (32)           |
| 150 days                                                                  | Absolute Change   | -0.7 (15)                                           | -5 (8)             | -19 (26)           | 6 (13)           |
|                                                                           | Percentage Change | 4 (27)                                              | -11 (22)           | -24 (22)           | 18 (31)          |
| 180 days                                                                  | Absolute Change   | 17 (14)                                             | -4 (6)             | -14 (28)           | 5 (10)           |
|                                                                           | Percentage Change | 35 (31)                                             | -9 (15)            | -14 (26)           | 13 (22)          |
| 201 days                                                                  | Absolute Change   | 10 (19)                                             | -2 (7)             | -16 (27)           | 2 (10)           |
|                                                                           | Percentage Change | 25 (37)                                             | -5 (22)            | -19 (32)           | 9 (24)           |



eFigure 1. Schematic of the Phase 1 Trial Showing the Ascending-Dose Approach for Single and Multiple Doses.

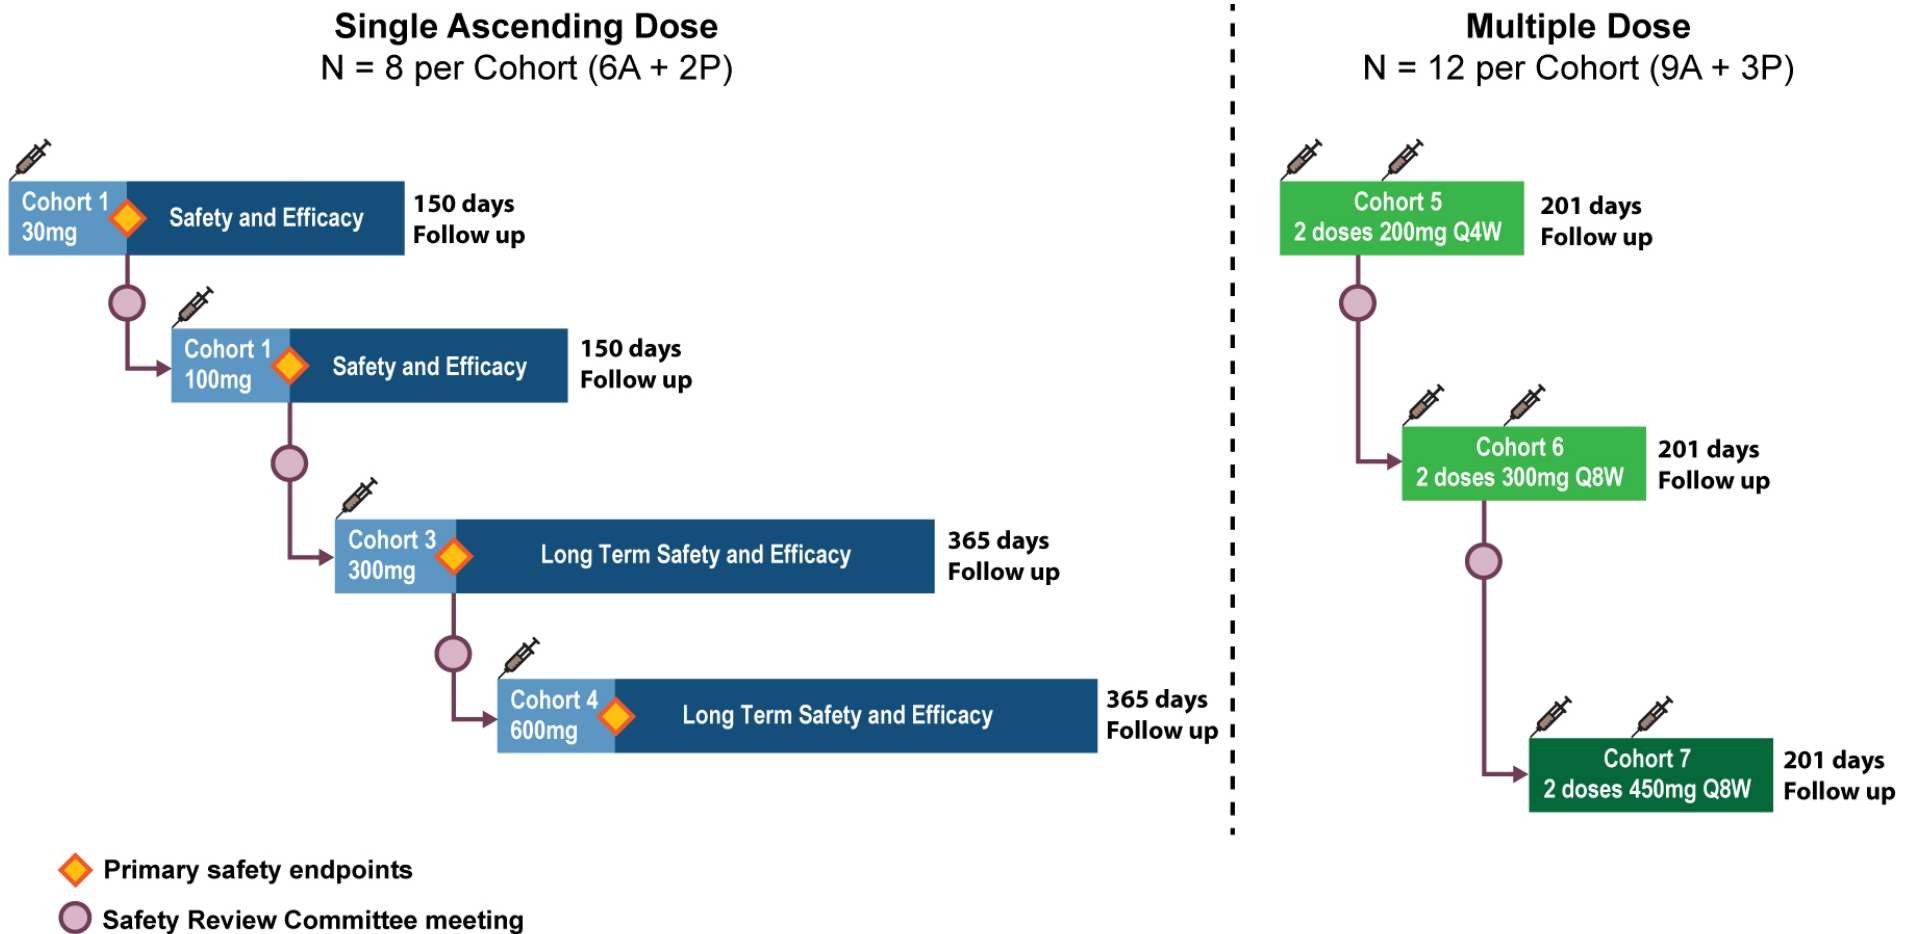

A - Zelarisan

P - Placebo (sodium chloride solution for injection)

A safety review committee evaluated each of the ascending dose groups and recommended escalation to the next higher dose levels based on initial safety and efficacy findings. At the recommendation of the committee, the two highest doses, 300 mg and 600 mg, had extended follow up to 365 days.

**eFigure 2. Distribution of Baseline Lipoprotein (a) Levels**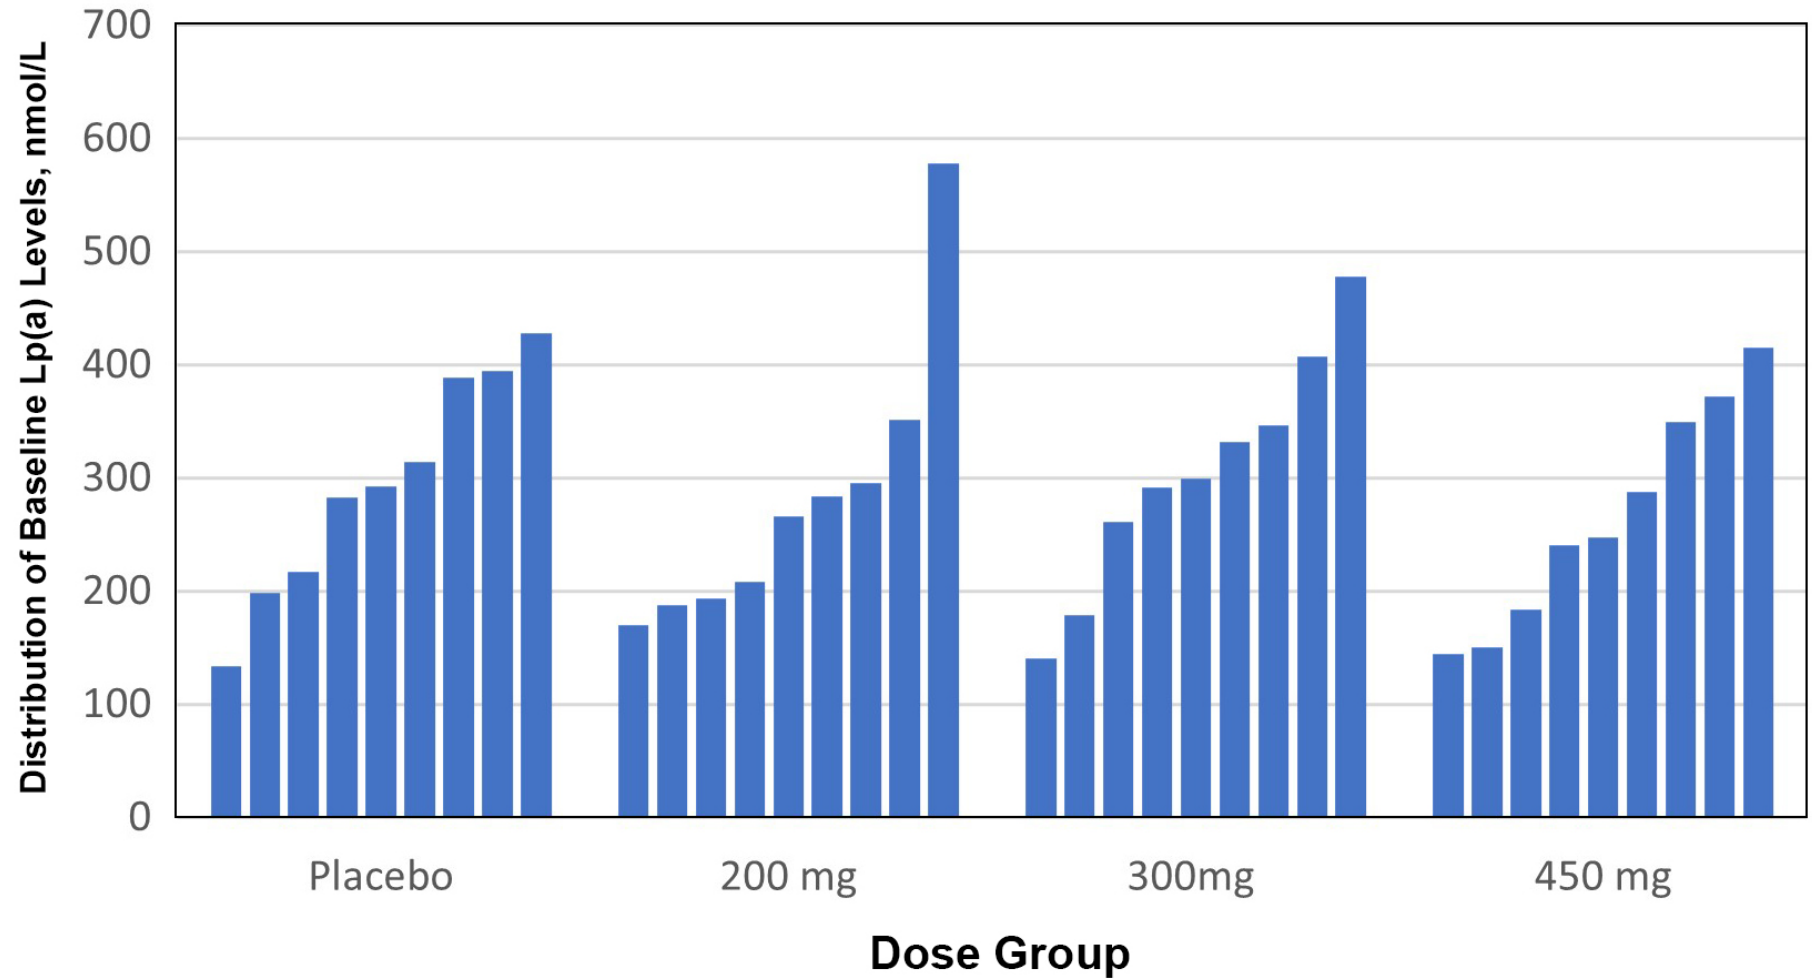

Baseline values for lipoprotein(a) in patients randomized in the multiple dose phase of the trial. Each bar represents the baseline Lp(a) value for a single patient.

eFigure 3A. Plasma Concentrations of Zerlasiran After the First Administered Dose

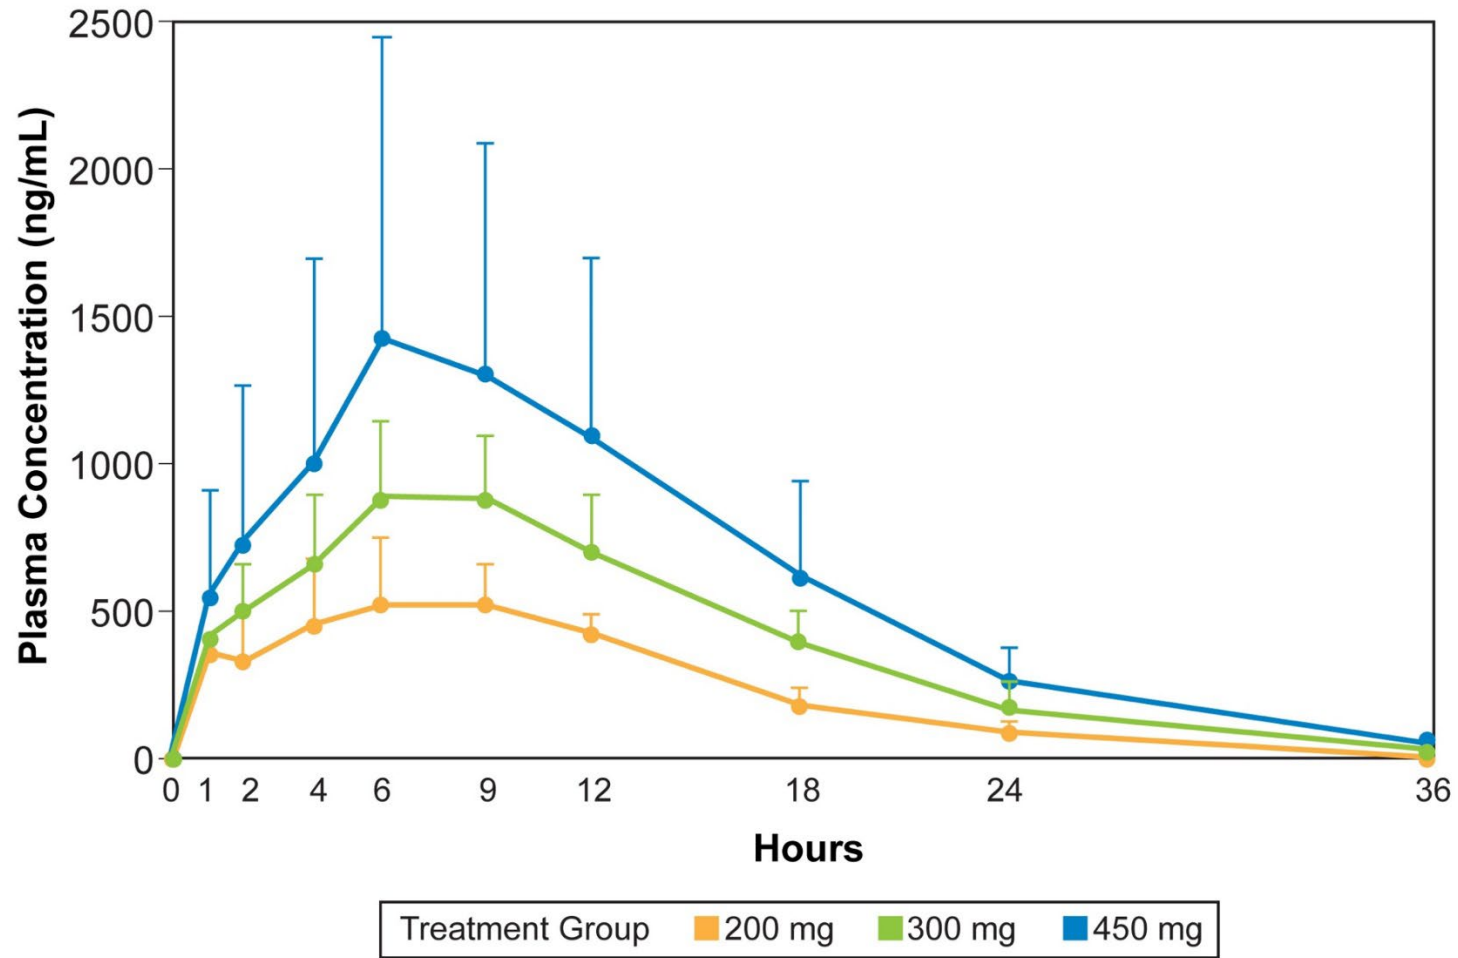

eFigure 3B. Plasma Concentrations of Zerlasiran after the Second Administered Dose

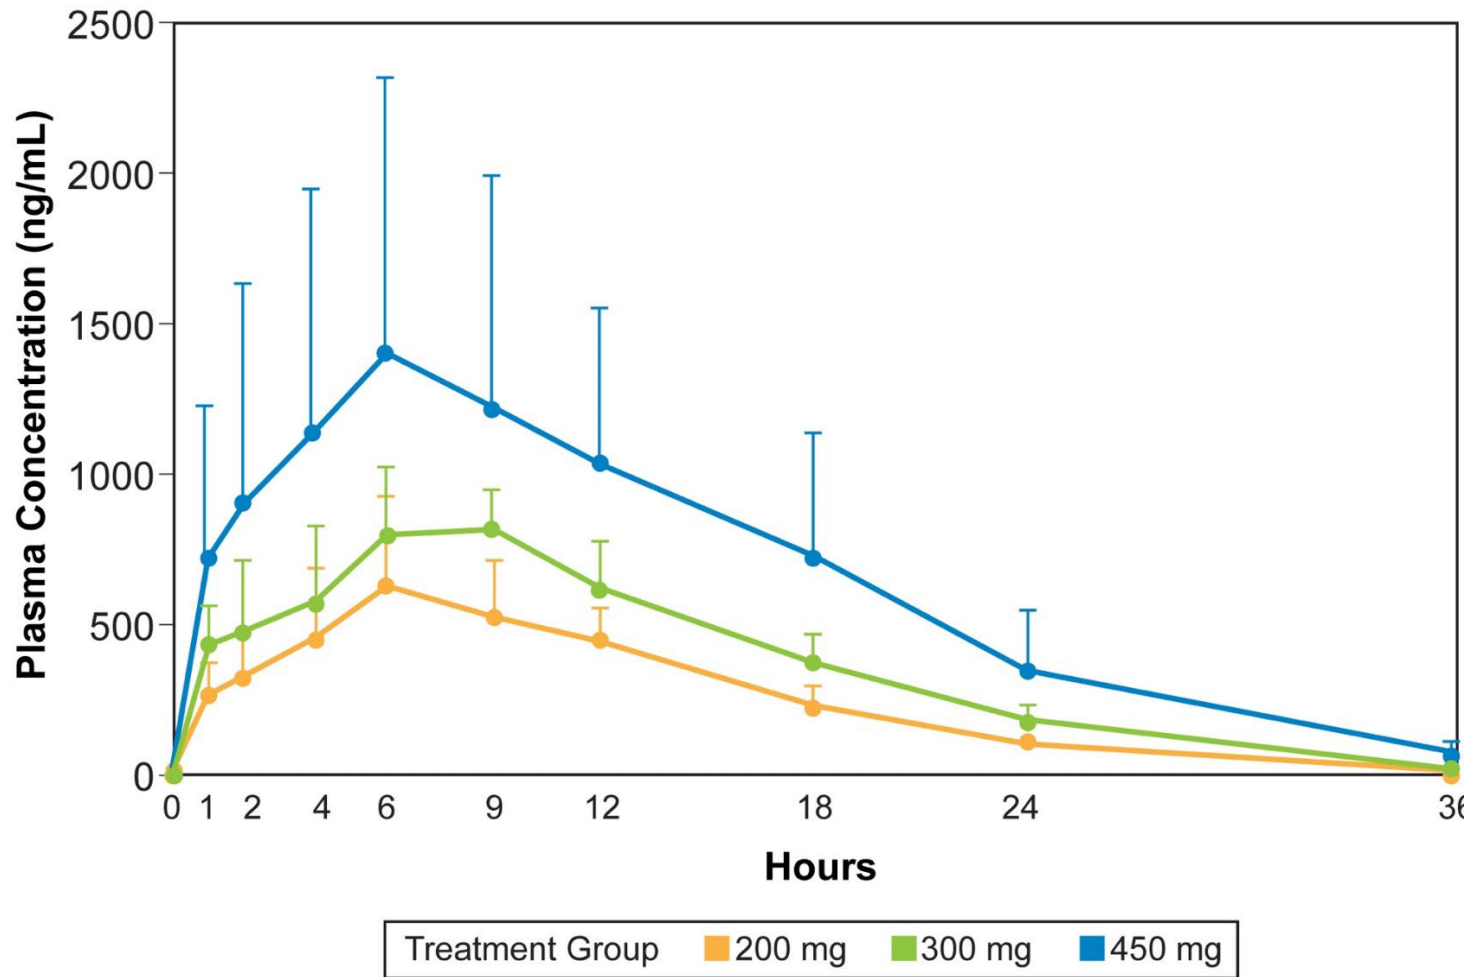

Plasma concentrations of zerlasiran during the first 36 hours following drug administration for the multiple dose cohort. Panel A. The solid circles indicate the mean values following the first injection, and the error bars show the standard deviations for plasma concentrations of zerlasiran at each time point. Panel B. Mean and standard deviations for plasma concentrations after the second injection.

eFigure 4. Observed Lipoprotein(a) Concentrations During 365 Days Follow-Up After a Single Dose

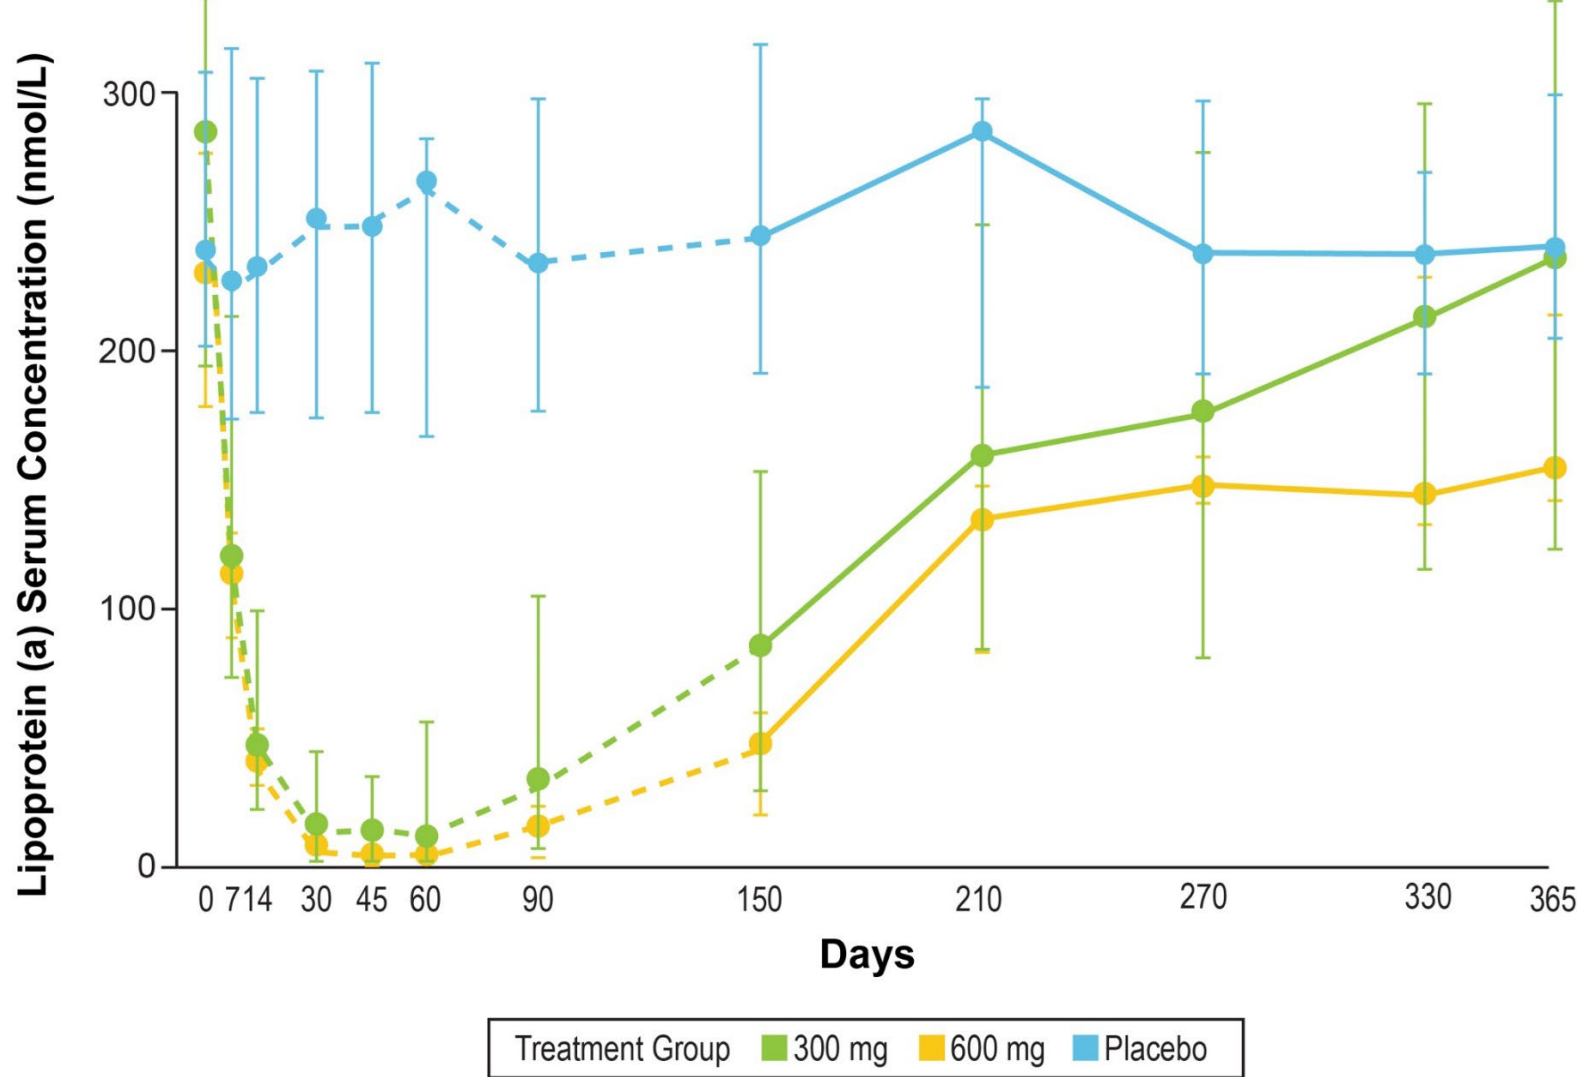

Observed Lipoprotein(a) concentrations during 365 days follow up after a single dose. The solid circles indicate median values and the error bars the IQR values after administration of single doses of zerlasiran. The dashed lines show previously reported data for Lp(a) concentrations during the first 150 days following administration.

eFigure 5. Observed Lipoprotein(a) Concentrations During 201 Days Follow-Up After Multiple Doses

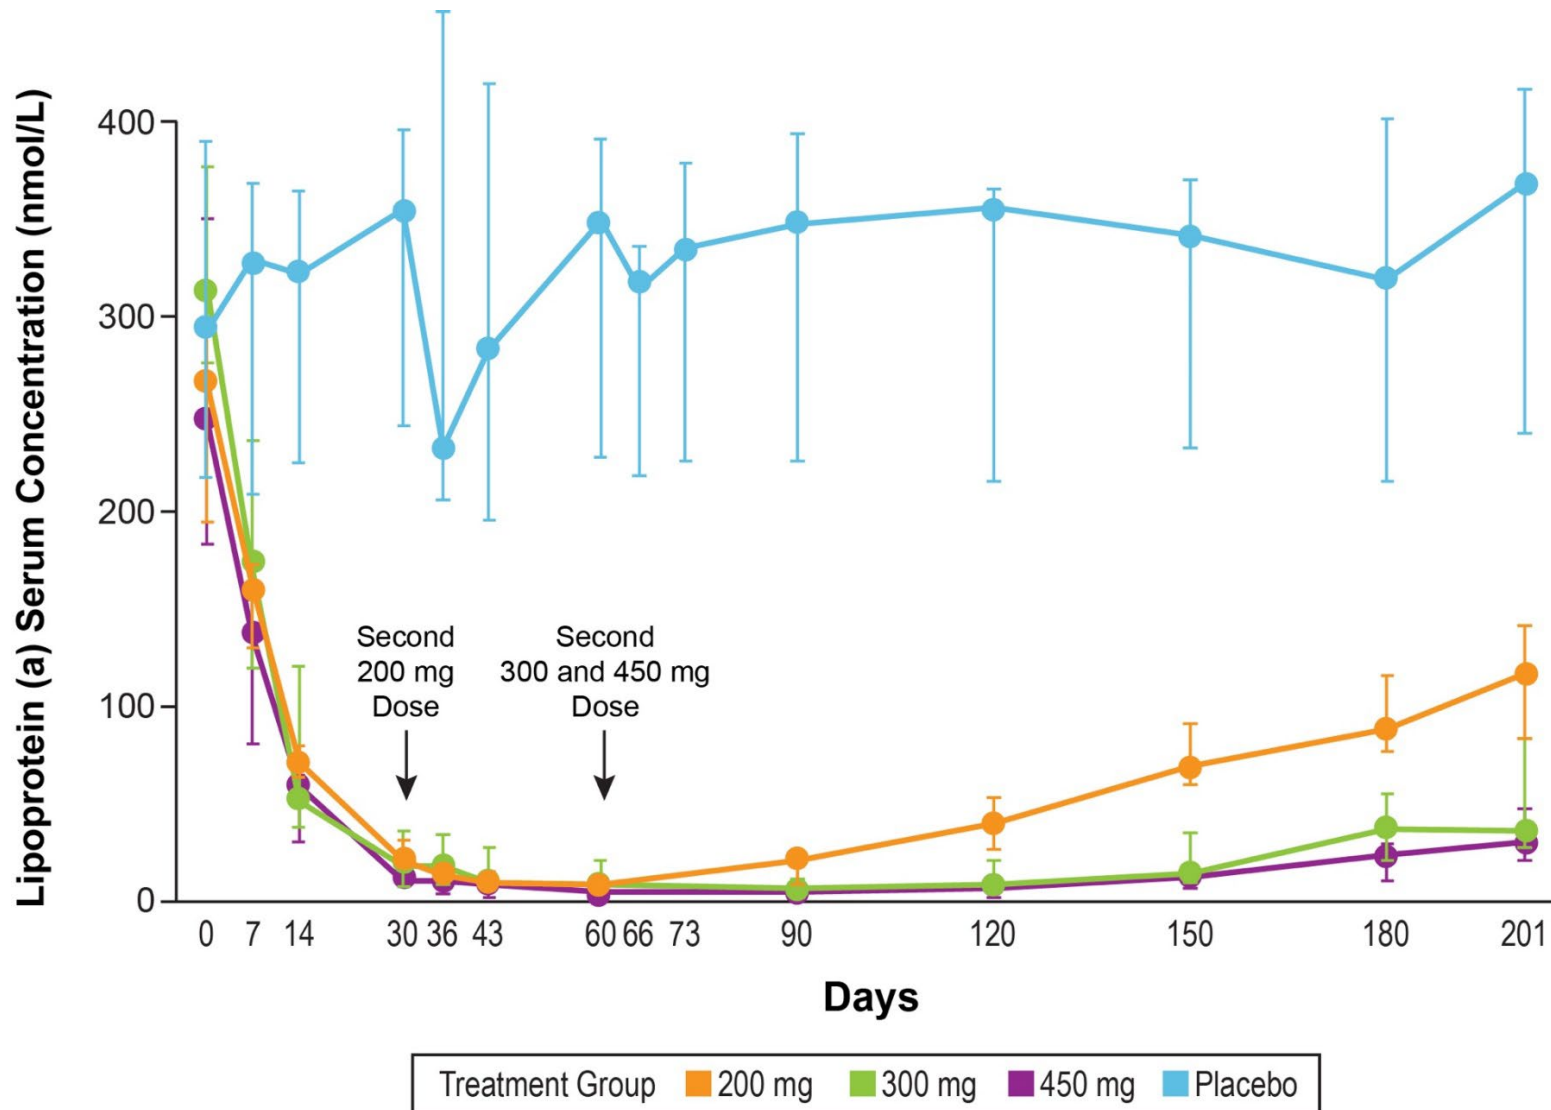

Median and IQR values for Lp(a) concentrations for the multiple dose cohort. The solid circles indicate median values and the error bars the IQR values for Lp(a) concentrations.

eFigure 6. Percent Change in LDL-C During 201 Days Follow-up After Multiple Doses

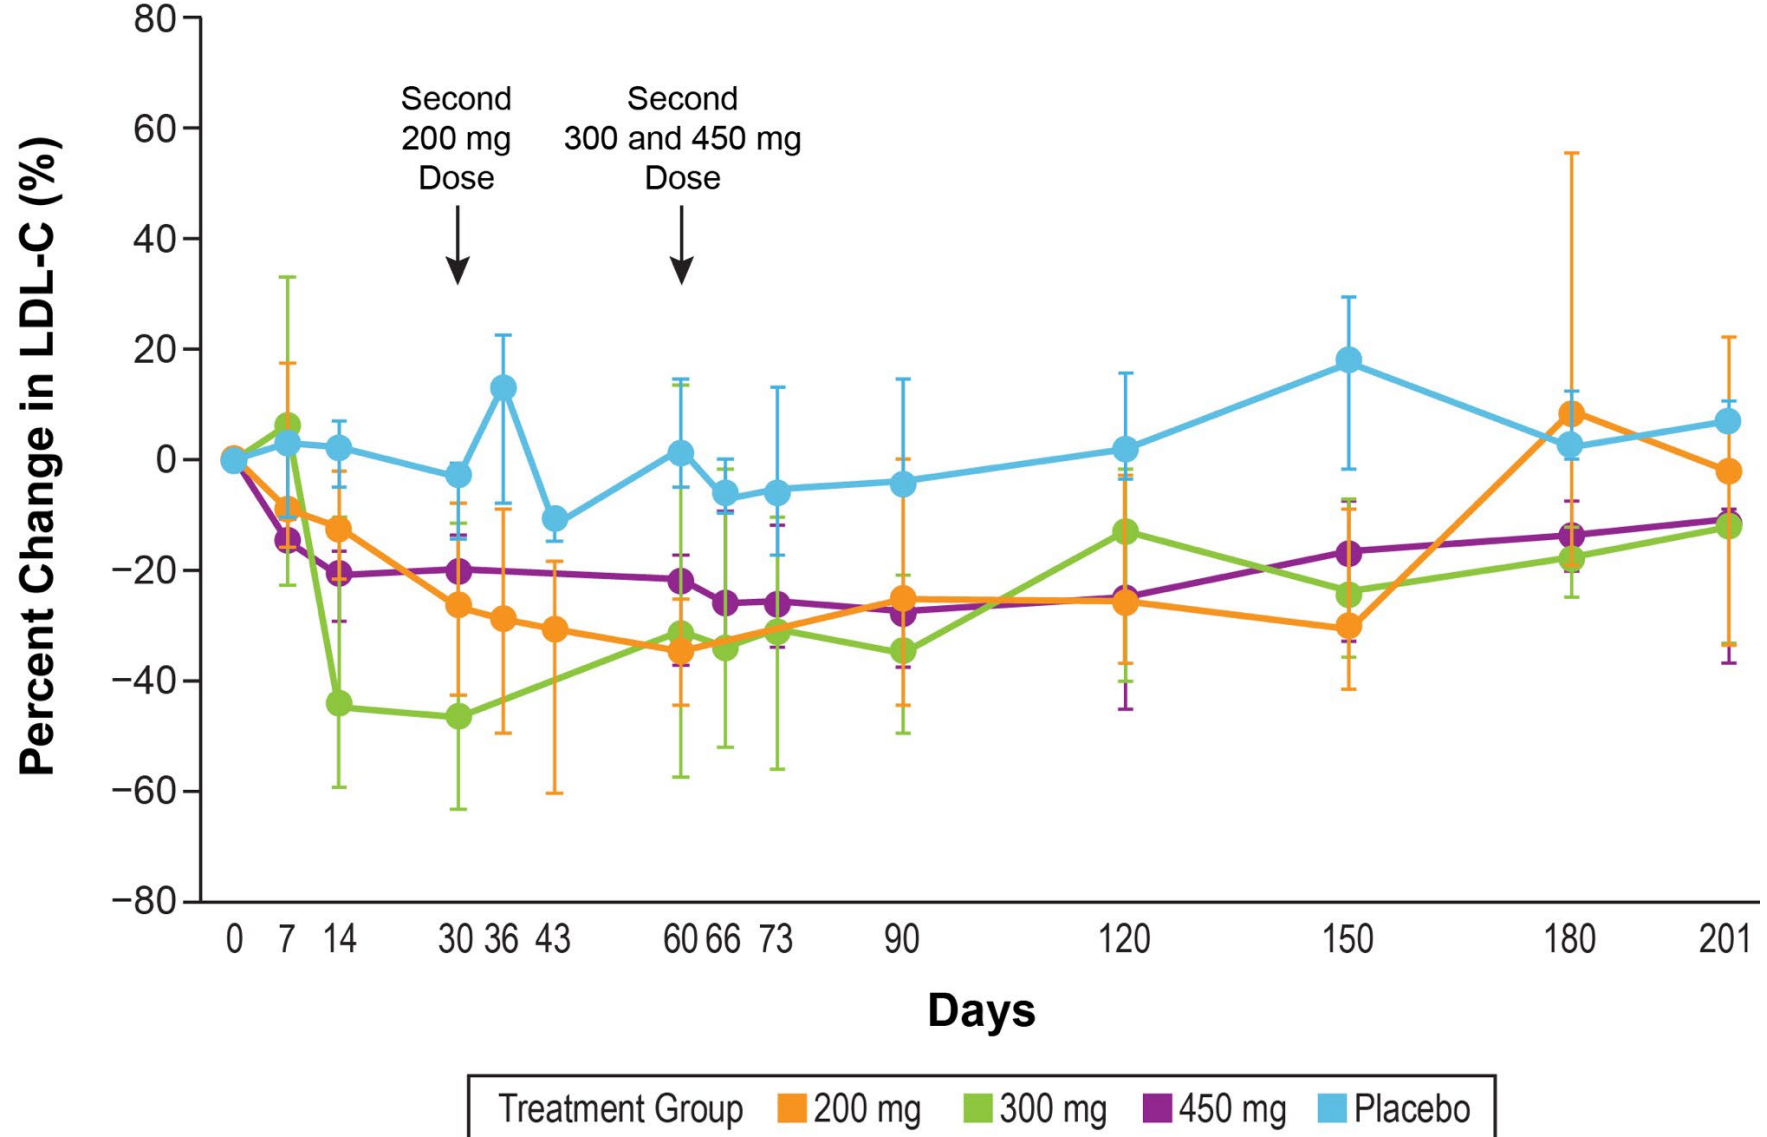

The solid circles indicate median values and the error bars the IQR values after administration of single and multiple doses of zelasiran.

**eFigure 7. Percent Change in Apo B During 201 Days Follow-Up After Multiple Doses**

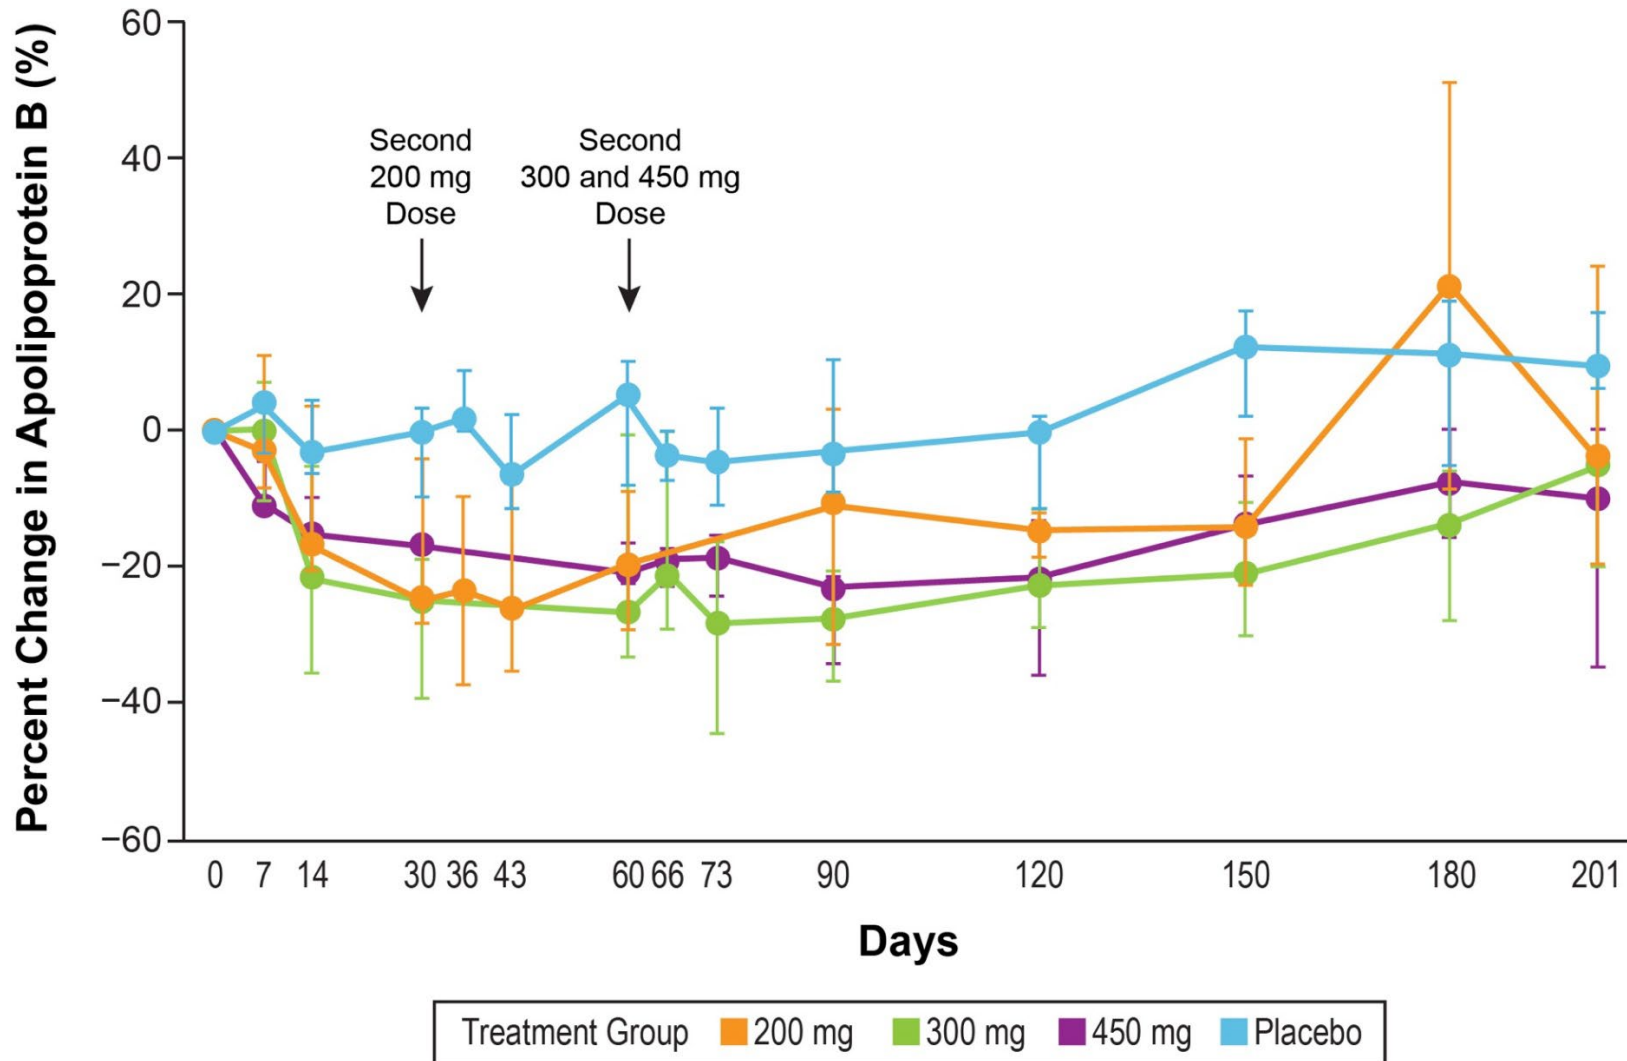

The solid circles indicate median values and the error bars the IQR values after administration of single and multiple doses of zerlasiran.
