# Supplementary material
Source: PubMed Central journal article supplement (PMC11002768)
Supplement: jama-e244504-s004.pdf [file jama-e244504-s004.pdf]

## Data Sharing Statement

Nissen. Single Ascending and Multiple-Dose Trial of Zerlasiran, a Short Interfering RNA Targeting Lipoprotein(a). *JAMA*. Published April 08, 2024. doi:10.1001/jama.2024.4504

### Data

**Data available:** No
